# Supplementary material
Source: PubMed Central journal article supplement (PMC5729743)
Supplement: NIHMS902318-supplement-1.pdf [file NIHMS902318-supplement-1.pdf]

Supplementary Figure-uncropped scans with size marker indications

Figure 1a

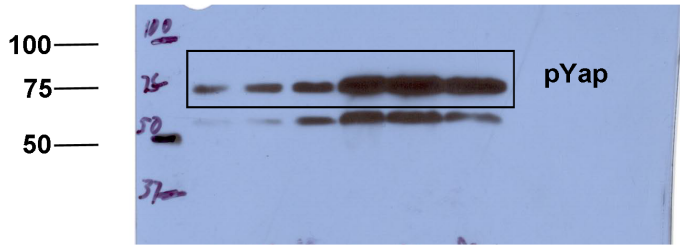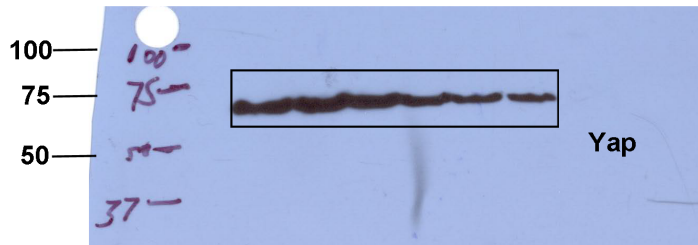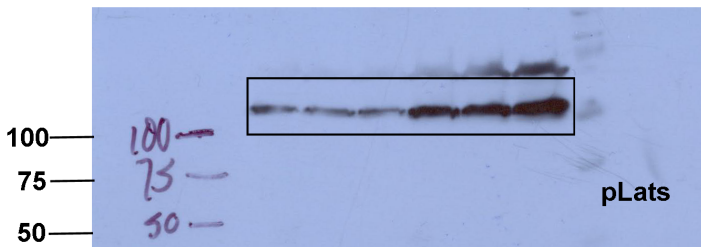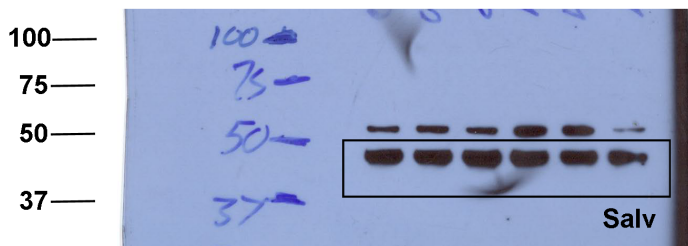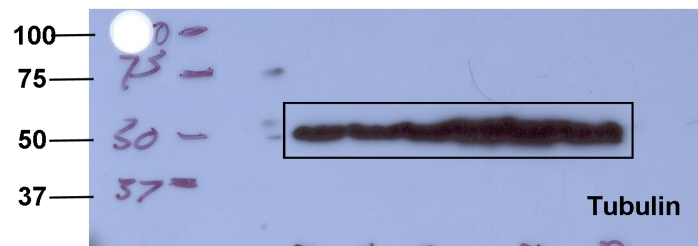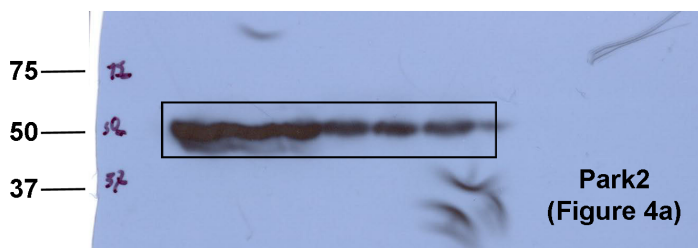

Figure 1b

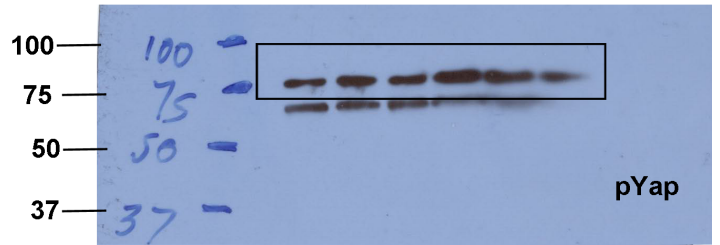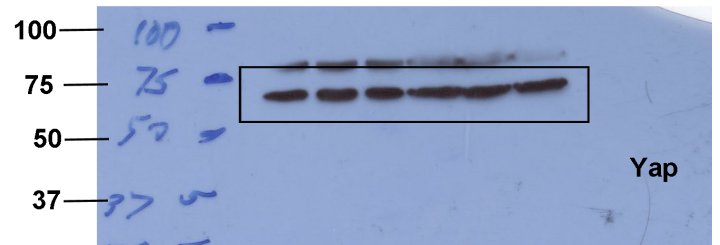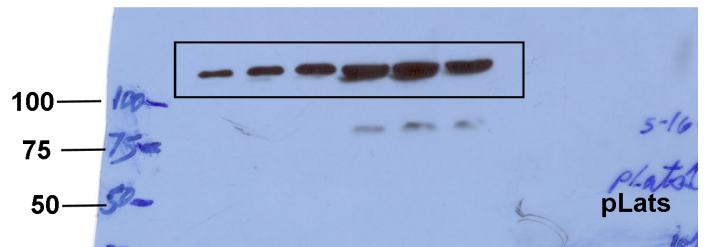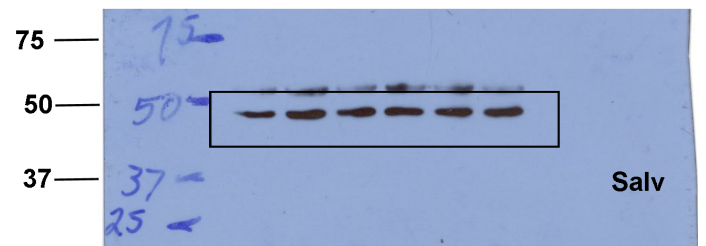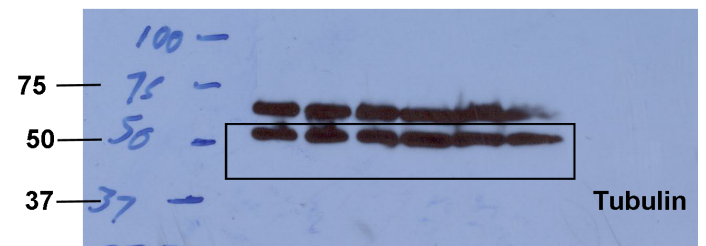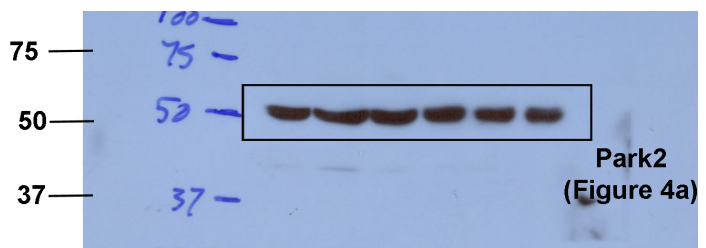

Extended Data Figure 1a

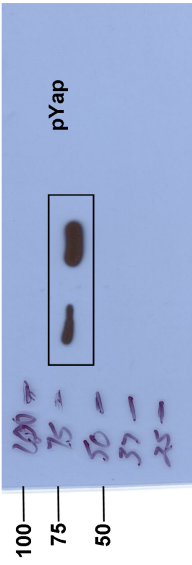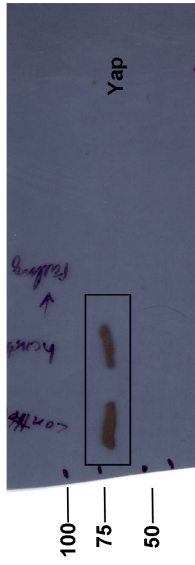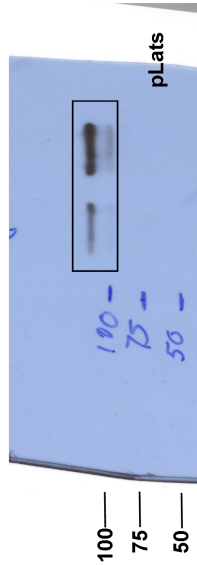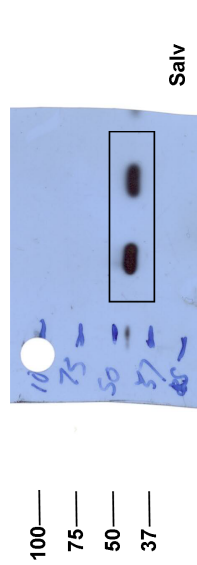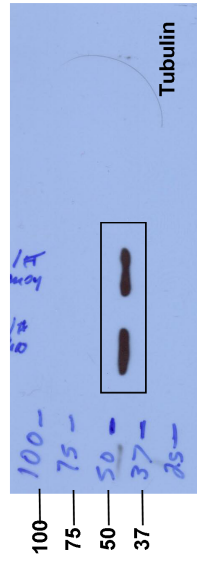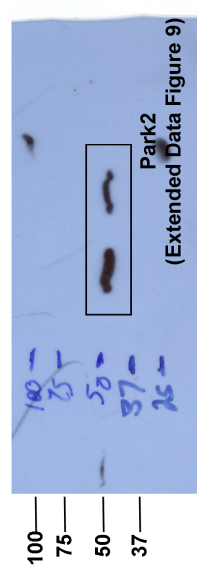

Extended Data Figure 10b

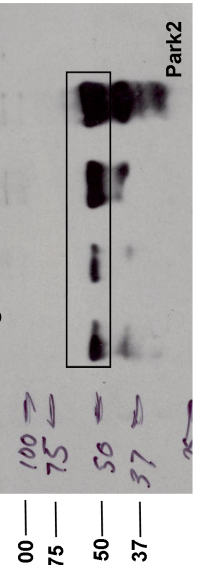

Extended Data Figure 1b

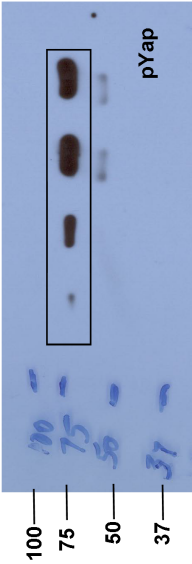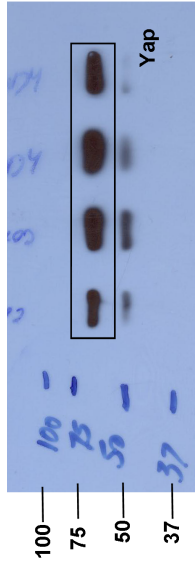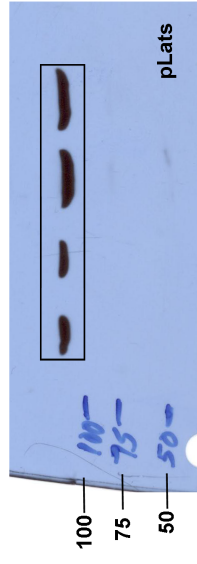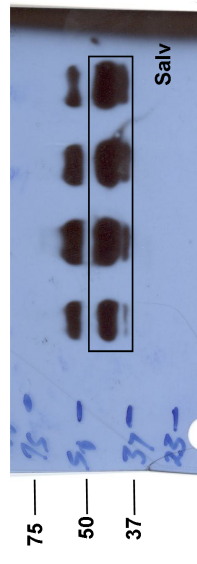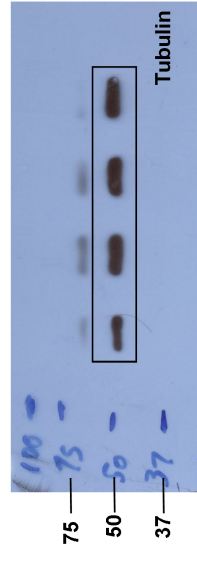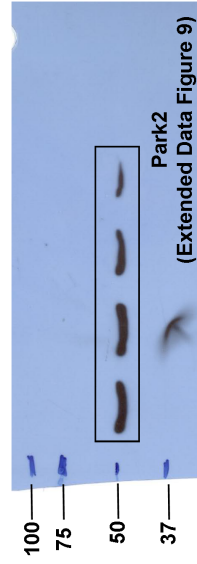

Extended Data Figure 10b

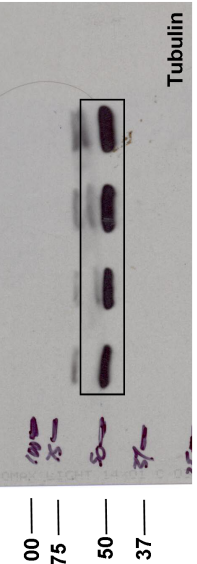

Extended Data Figure 1c

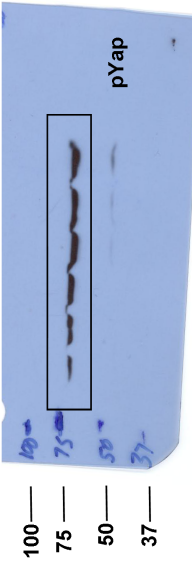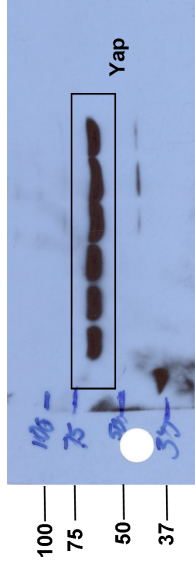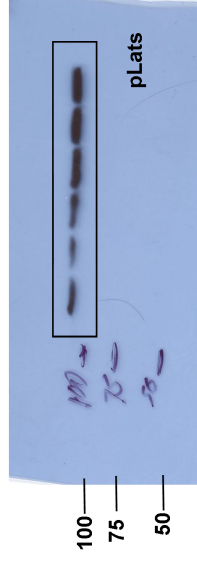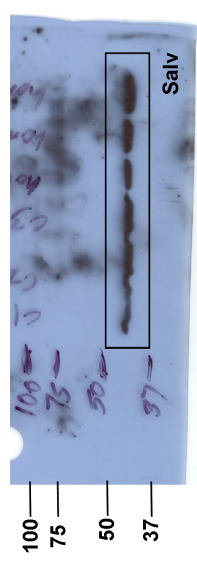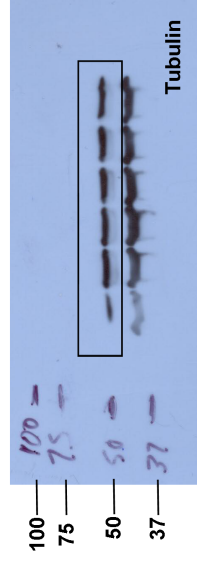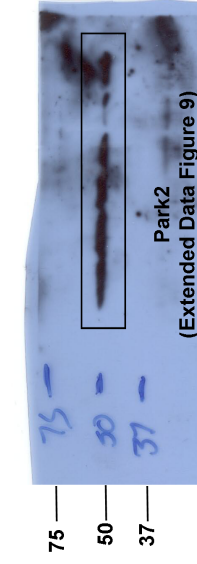

Extended Data Figure 9

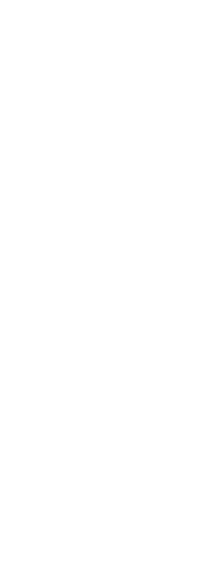

**Supplementary Table 1: qPCR primers**

|                       |                         |
|-----------------------|-------------------------|
| <b>Angpt1 Forward</b> | GAGGATTGAGCTGATGGACTG   |
| <b>Angpt1 Reverse</b> | ACCGTGTAAGATCAAGCTGC    |
| <b>Angpt2 Forward</b> | GCTGGTGAAGAGTCCAACACTAC |
| <b>Angpt2 Reverse</b> | GATGCTACTTATTTTGCCCGC   |
| <b>Fgf14 Forward</b>  | ACAAGAACCCAACTGATCCC    |
| <b>Fgf14 Reverse</b>  | ACTGGGATGAGGTTGAACAG    |
| <b>Fgf18 Forward</b>  | CAAGGGCAAGGAGACAGAAT    |
| <b>Fgf18 Reverse</b>  | GTACTIONGGCAGACATCAGGG  |
| <b>GapDH Forward</b>  | CTTTGTCAAGCTCATTTCTCTGG |
| <b>GapDH Reverse</b>  | TCTTGCTCAGTGTCTTGC      |
| <b>Myh6 Forward</b>   | GCTTCAGCTGGAAGAAAAGCTC  |
| <b>Myh6 Reverse</b>   | CCTCCTCCAGCTCCTCGAT     |
| <b>Myh7 Forward</b>   | CAAGCAGCAGTTGGATGAGC    |
| <b>Myh7 Reverse</b>   | CGTGCCTGAAGCTCCTTGA     |
| <b>Nppa Forward</b>   | GTGCGGTGTCCAACACAGAT    |
| <b>Nppa Reverse</b>   | CCCTGCTTCCTCAGTCTGCT    |
| <b>Nppb Forward</b>   | GGACCAAGGCCTCACAAAAG    |
| <b>Nppb Reverse</b>   | TACAGCCCAAACGACTGACG    |
| <b>Vegfa Forward</b>  | GGCAGCTTGAGTTAAACGAAC   |
| <b>Vegfa Reverse</b>  | TGGTGACATGGTTAATCGGTC   |
| <b>Vegfb Forward</b>  | GCAACACCAAGTCCGAATG     |
| <b>Vegfb Reverse</b>  | GTATGGCAACCCTGTCTGG     |
| <b>Salv Forward</b>   | GCTTCTGGAGATGGTGTAGTTT  |
| <b>Salv Reverse</b>   | CAGTCTGTGGCTTTCTTTCTC   |
